# Supplementary material
Source: PubMed Central journal article supplement (PMC7350928)
Supplement: NIHMS1587736-supplement-supplementary_material.pdf [file NIHMS1587736-supplement-supplementary_material.pdf]

# **SUPPLEMENTARY MATERIALS**

## **Supplementary Methods**

### **Alkaline Phosphatase Histochemical Staining**

Alkaline phosphatase staining was performed using 5-bromo-4-chloro-3-indolyl phosphate nitro blue tetrazolium (BCIP-NBT) as a substrate. This substrate was prepared by mixing 66µl NBT stock (0.5g NBT in 10ml 70% dimethyl formamide) with 10ml alkaline phosphatase reaction buffer (100mM NaCl, 5mM MgCl<sub>2</sub>, 100mM Tris-Hcl, pH 9.5) and then adding 33µl BCIP stock (0.5g BCIP disodium salt in 10ml 100% dimethyl formamide). The cells were incubated in this substrate mixture for 30 min at 37°C in the dark. The substrate was then aspirated and the cells were washed with dH<sub>2</sub>O and air dried.

### **PCR for Gender Determination on Genomic DNA**

Cells were grown in a T150 flask and cell lysis and DNA extraction were performed using a Wizard Genomic DNA Purification Kit, according to manufacturer's instructions (#A1120 Promega, Madison, WI). 200ng of DNA was amplified in a PCR reaction containing 0.5 µM Jarid primers (Jarid 1 c Forward: 5'-CTG AAG CTT TTG GCT TTG AG-3', Jarid 1 c Reverse: 5'-CCA CTG CCA AAT TCT TTG G-3') in a total volume of 50µl using REDTaq ReadyMix PCR Reaction Mix (#R2523 Sigma Aldrich). The Jarid primers amplify 2 bands in males (302 and 331 bp) but only one band in females (331 bp) [1].

### **References for Supplementary Methods:**

1. Clapcote SJ, Roder JC. Simplex PCR assay for sex determination in mice. *BioTechniques*. 2005;38(5):702, 4, 6.

## **Supplementary Tables**

**Table S1 - Primers used for Taqman qPCR** (numbers refer to the expression assay ID numbers, Themofisher/Lifetechnologies)

| <b>Gene symbol (alias)</b>                           | <b>TaqMan Gene Expression Assay ID</b> |
|------------------------------------------------------|----------------------------------------|
| <i>Pdgn</i> (Podoplanin, E11/gp38)                   | Mm00494716_m1                          |
| <i>Dmp1</i>                                          | Mm01208365_m1                          |
| <i>Phex</i>                                          | Mm00448119_m1                          |
| <i>Mepe</i>                                          | Mm02525159_s1                          |
| <i>Sost</i>                                          | Mm00470479_m1                          |
| <i>Fgf23</i>                                         | Mm00445621_m1                          |
| <i>Tnfrsf11</i> (RANKL)                              | Mm00441906_m1                          |
| <i>Tnfrsf11b</i> (OPG)                               | Mm00435454_m1                          |
| <i>Colla1</i>                                        | Mm00801666_g1                          |
| <i>Alpl</i> (Alkaline phosphatase liver/bone/kidney) | Mm00475834_m1                          |
| <i>Gja1</i> (Connexin 43, Cx43)                      | Mm00439105_m1                          |
| <i>Hif1a</i> (HIF-1 alpha)                           | Mm00468869_m1                          |
| <i>Actb</i> ( $\beta$ -actin)                        | Mm01205647_g1                          |

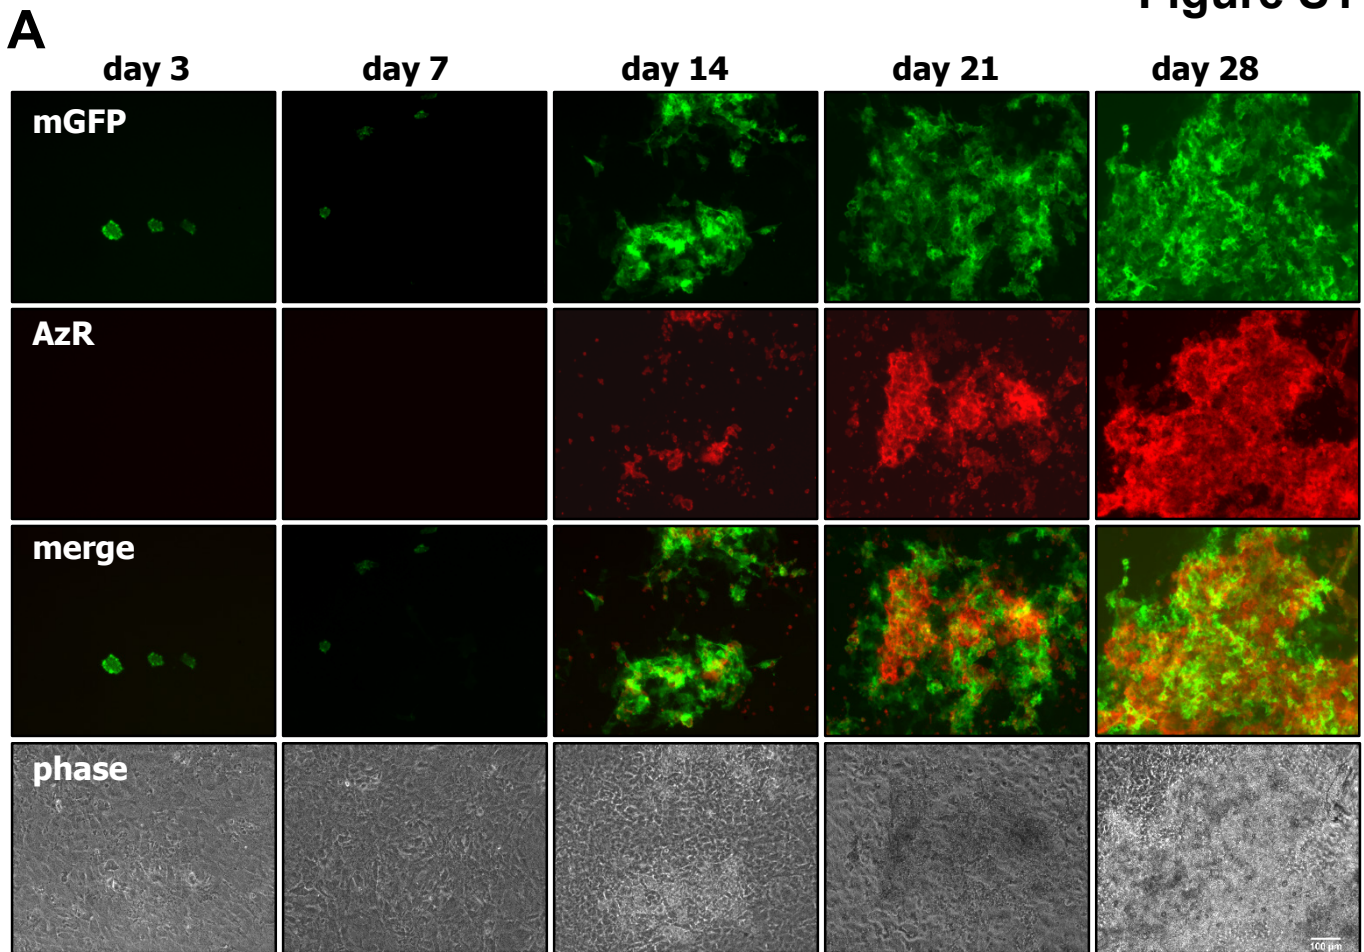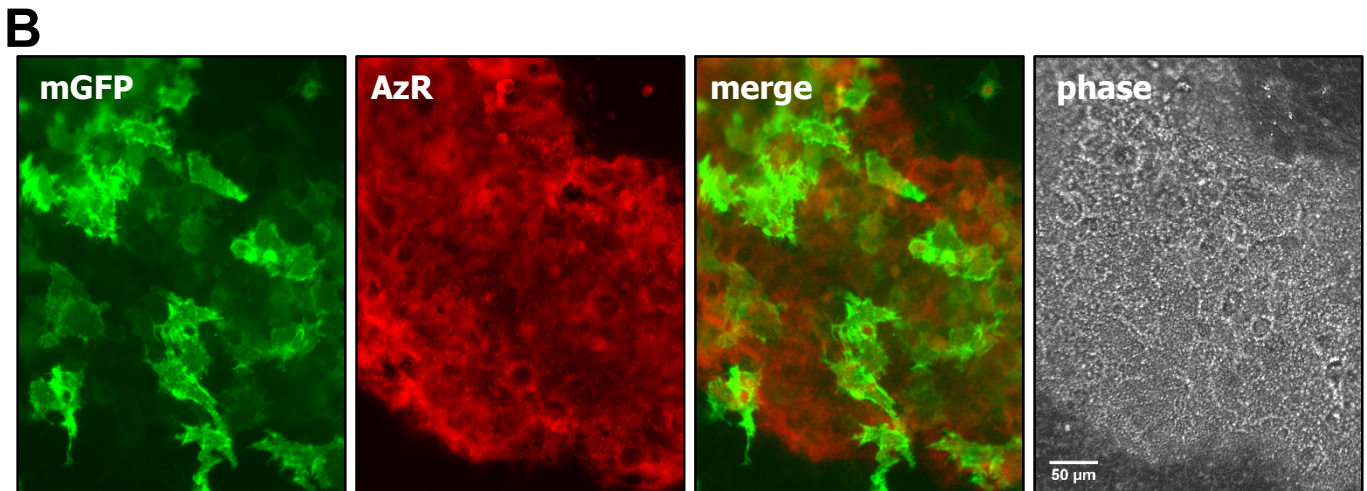

**Figure S1: OmGFP10 cells form mineralized bone nodules over 7-28 days in culture. A)** Time course in OmGFP10 cells showing expression of the Dmp1-mGFP reporter (green) and mineralization imaged using alizarin red fluorescence to monitor calcium deposition (red). Note the appearance of a few Dmp1-mGFP-positive cells by day 3-7 with larger foci of mGFP-positive cells by day 14, accompanied by mineral deposition. Merged images show that the Dmp1-mGFP-positive cells are associated with the mineralized foci, but extend beyond the boundary of the mineralized region. Bar = 100 $\mu$ m. **B)** Higher power views showing the morphology of the Dmp1-mGFP-positive OmGFP10 cells. Bar = 50 $\mu$ m.

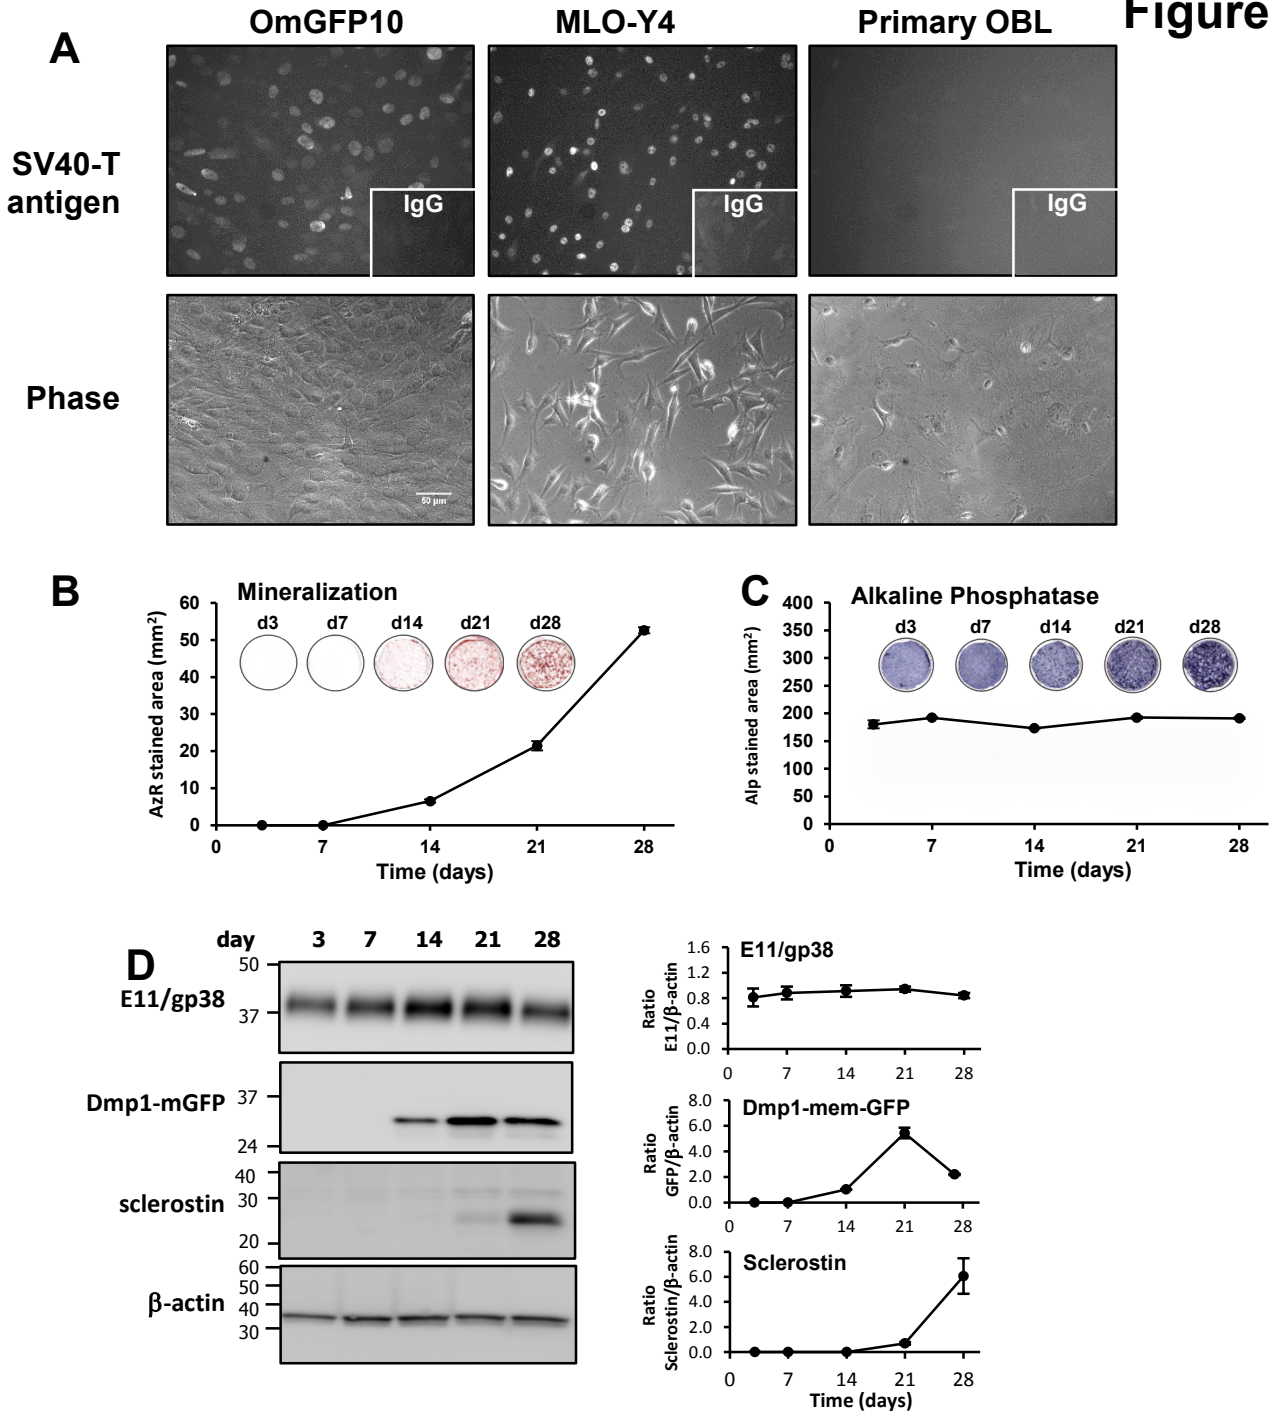

**Figure S2: OmGFP10 cells mineralize over 28 days in culture and express early and late osteocyte markers.** **A)** Immunostaining for SV40T-antigen in OmGFP10 cells compared to MLO-Y4 cells as a positive control and primary mouse osteoblasts as a negative control. Controls stained with non-immune IgG are shown in the insets and phase contrast images of the cells are shown below. Bar = 50 $\mu$ m. **B, C)** Quantitation of alizarin red stained area (**B**) and alkaline phosphatase stained cell area (**C**) in OmGFP10 cells over the 28-day time course (data are mean  $\pm$  SEM, n= 3). **D)** Western blotting timecourse on whole cell lysates from OmGFP10 cells showing constitutive expression of E11/gp38 and showing Dmp1-mGFP expression starting at day 14, with sclerostin expression by day 21-28.  $\beta$ -actin was used as a control for equal loading of protein. Quantitation of the western blots is shown at right (data are mean  $\pm$  SEM, n=3).

**Figure S3**

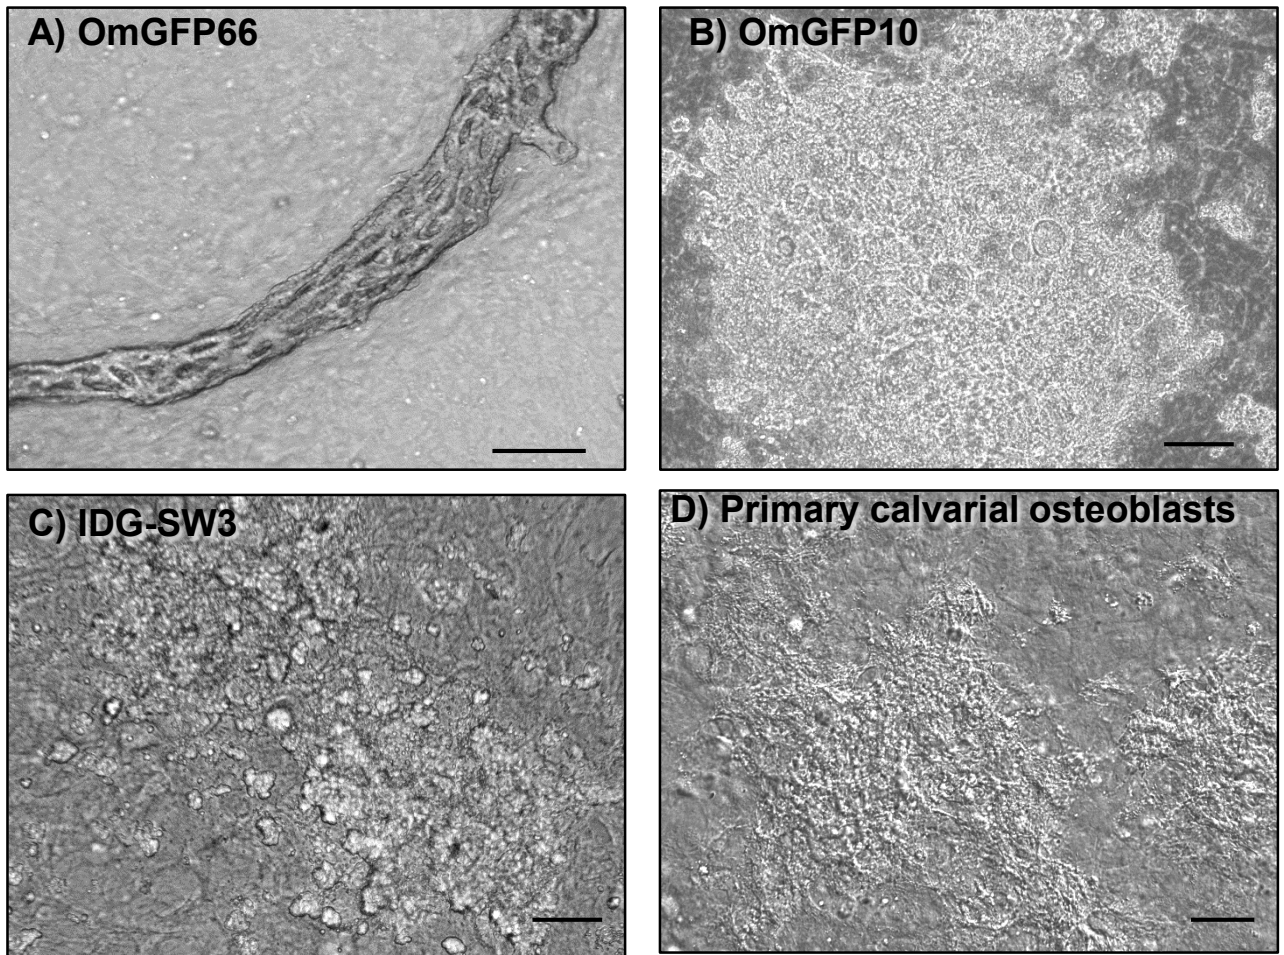

**Figure S3: Comparison of highly organized OmGFP66 bone-like structures to mineralized bone nodules formed in other osteogenic cell lines and primary osteoblasts. A) OmGFP66 cells showing highly structured mineral with well defined lacunae, compared with B) OmGFP10 cells, C) IDG-SW3 cells and D) primary calvarial osteoblasts, all of which show a more disorganized and less structured mineral deposition. Bar = 40µm.**

A

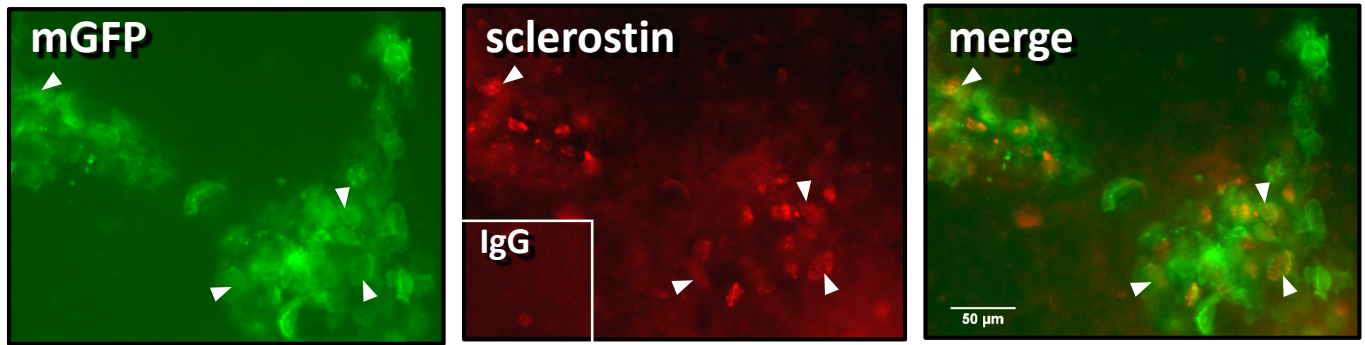

B

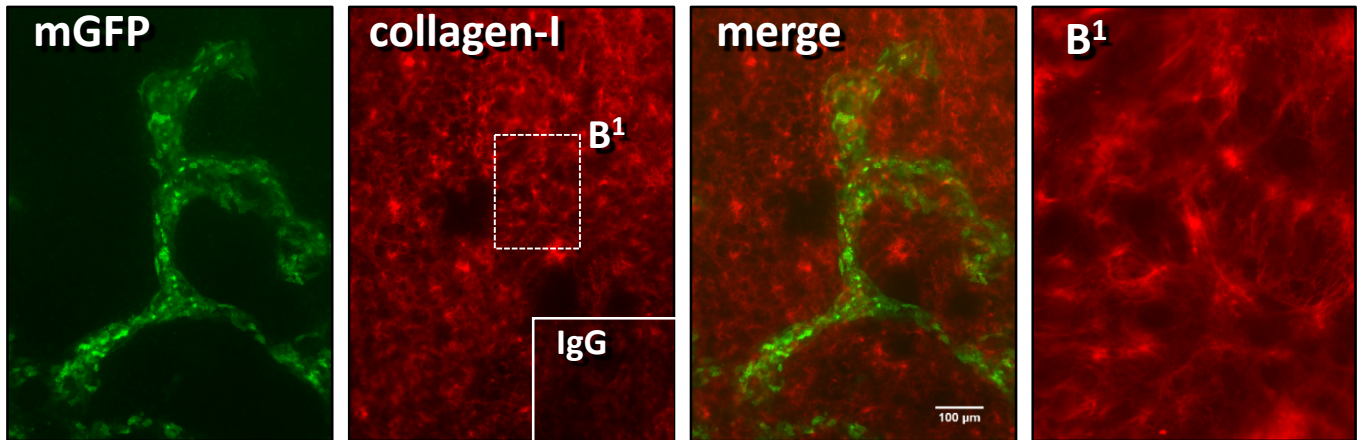

**Figure S4: OmGFP66 cells express sclerostin and type I collagen.** **A)** Widefield epifluorescence images of sclerostin immunostaining in day 21 OmGFP66 cell cultures. The control stained with non-immune IgG is shown in the inset. Note that several of the more deeply embedded cells within the bone-like structure are positive for both sclerostin and Dmp1-mGFP (arrowheads), bar = 50μm. **B)** Widefield epifluorescence images of type I collagen immunostaining in day 21 OmGFP66 cell cultures. The control stained with non-immune IgG is shown in the inset. Note that type I collagen is expressed by the monolayer cells and is also present in the bone-like structures demarcated by Dmp1-mGFP positive cells. B<sup>1</sup> shows an enlargement of the boxed area, showing the fibrillar nature of the collagen immunostaining. Bar = 100μm.

## A) Osteocyte Marker Gene Expression

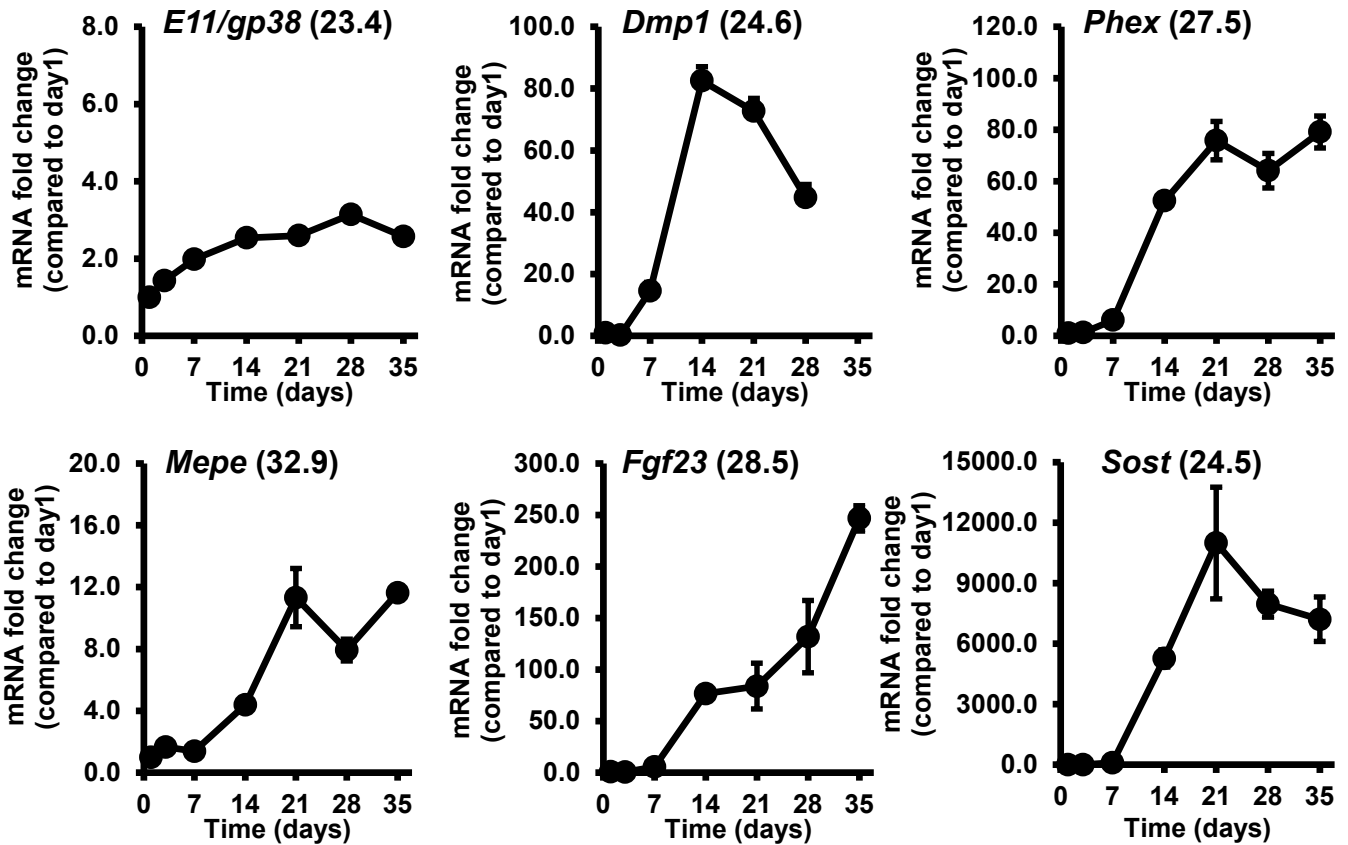

## B) Expression of other Markers

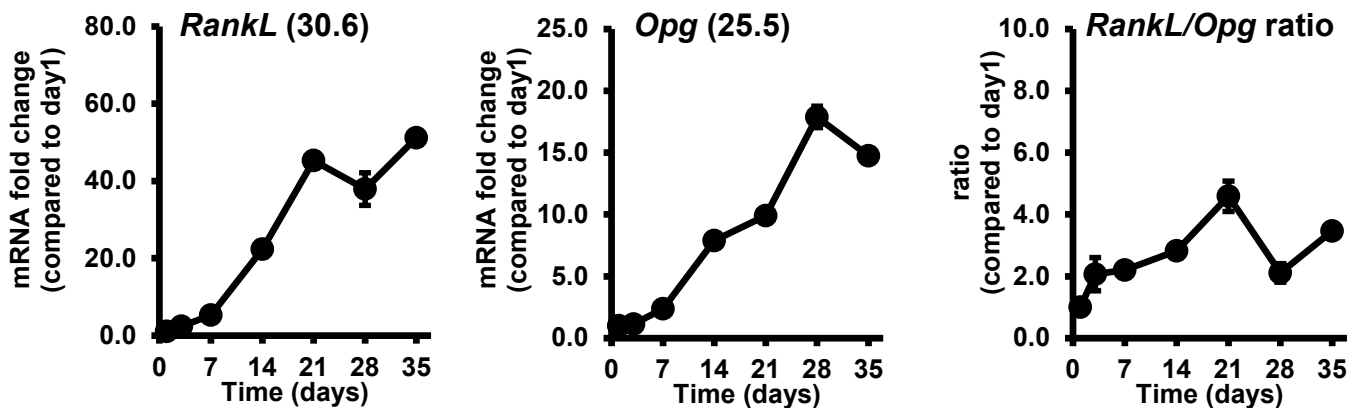

**Figure S5: Timecourse of expression of osteocyte markers by OmGFP10 Cells.** qPCR analysis of the timecourse of expression of **A)** osteocyte marker genes, *E11/gp38*, *Dmp1*, *Phex*, *Mepe*, *Fgf23* and *Sost* by OmGFP10 cells and **B)** other markers, *RankL* and *Opg*. Data were normalized to  $\beta$ -actin as a housekeeping control and are presented as the fold change compared to day 1 (mean  $\pm$  SEM, n=3). Numbers in parentheses are the Ct values for the highest level of expression of each gene.

**Figure S6**

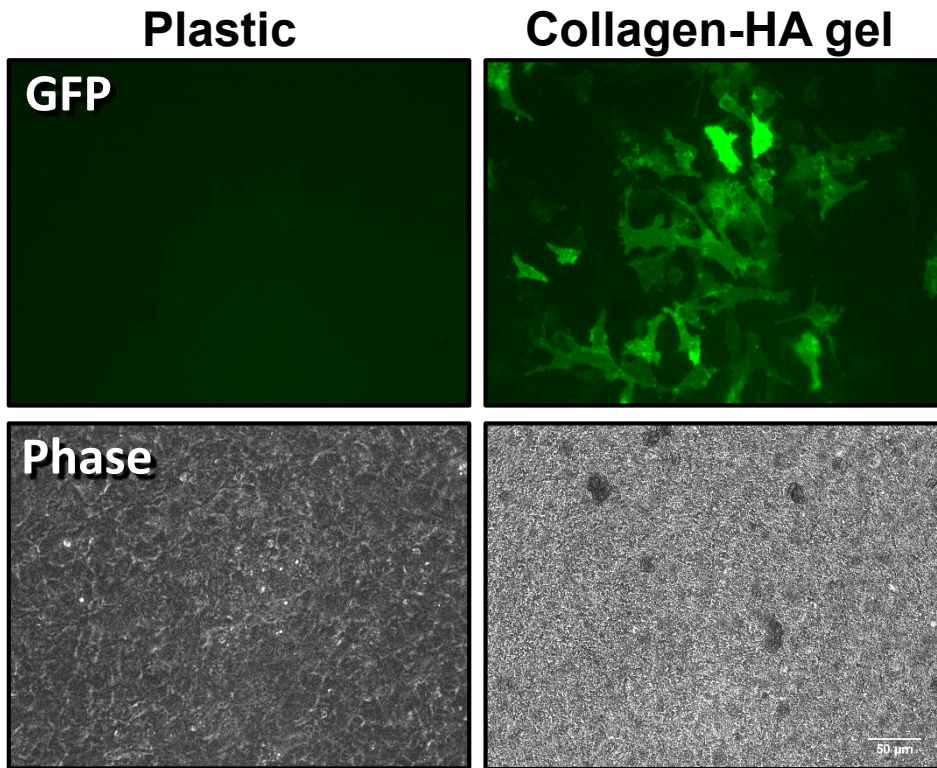

**Figure S6: A collagen-hydroxyapatite gel can induce expression of Dmp1-mGFP in OmGFP66 cells.** OmGFP66 cells were grown in culture dishes coated with a collagen-HA gel for 5 days. Note the strong induction of Dmp1-mGFP fluorescence in the cells cultured on collagen-HA compared to control cells cultured on plastic. Phase contrast images are shown below. Bar = 50 $\mu$ m.



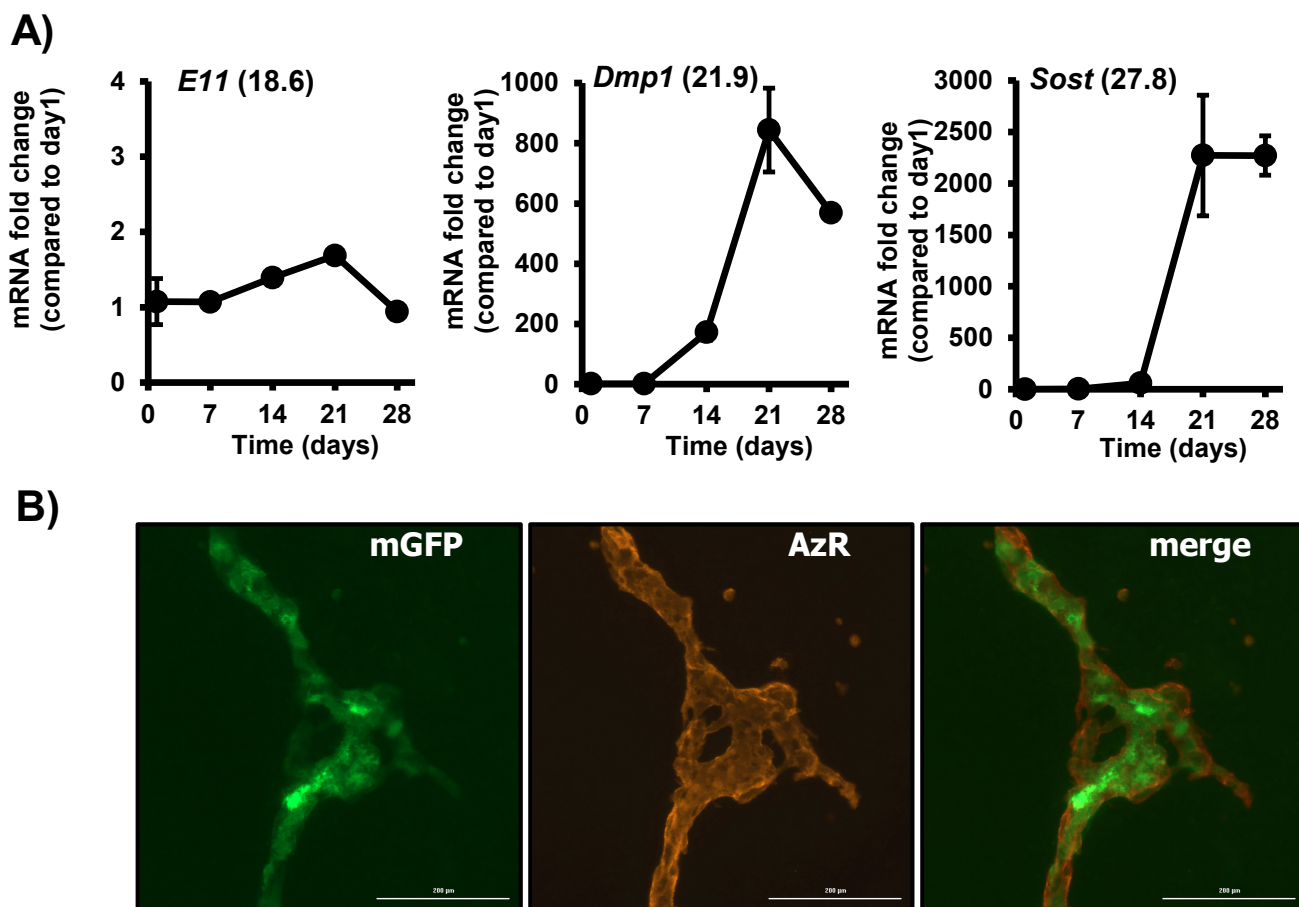

**Figure S7: Reproducibility of OmGFP66 phenotype** – OmGFP66 cells were grown independently in the laboratory of Dr. Matt Prideaux, Indiana University. **A)** Analysis of the timecourse of expression of osteocyte marker genes, *E11/gp38*, *Dmp1* and *Sost* showed similar results to our laboratory (figure 4A in main manuscript). Data were normalized to  $\beta$ -actin and are presented as the fold change compared to day 1 (mean  $\pm$  SEM, n=3). Numbers in parentheses are the Ct values for the highest level of expression of each gene. **B)** Fluorescence images of Dmp1-mGFP, alizarin red and merged image in day 21 OmGFP66 cells showing reproducible formation of bone-like structures containing mGFP-positive osteocytes. Bar = 200 $\mu$ m.

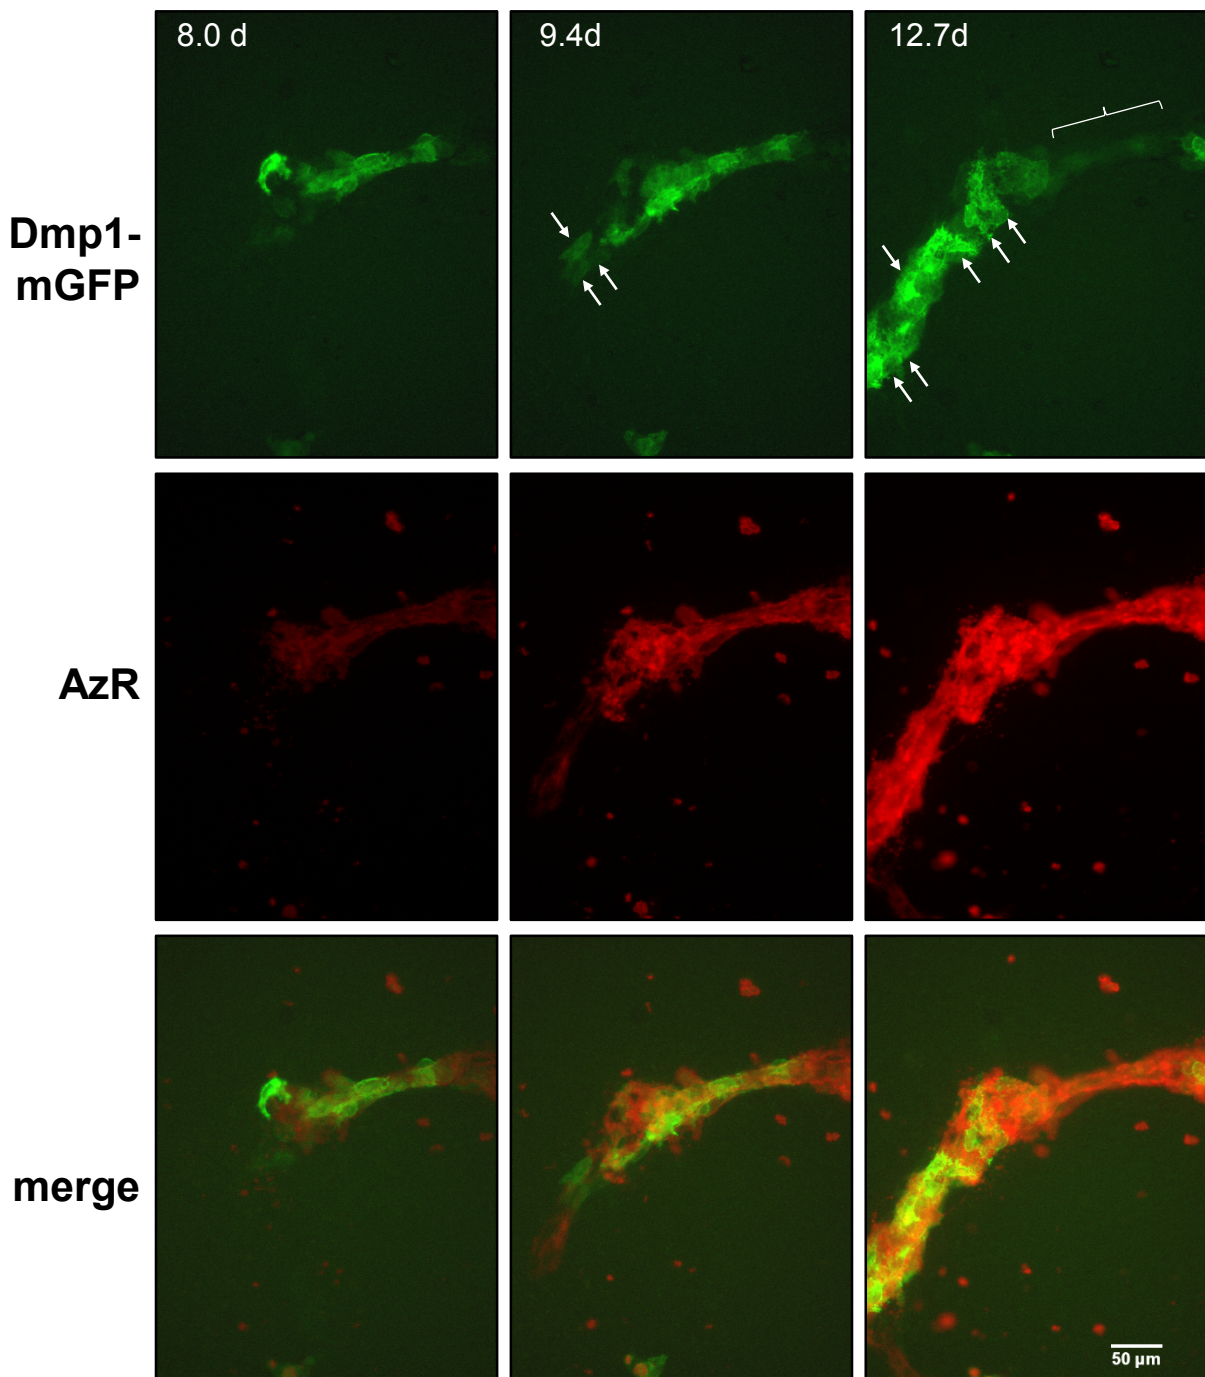

**Figure S8 : Widefield epifluorescence timelapse imaging of OmGFP66 mineralized bone structures.** Still frames from a timelapse movie of a day 8 OmGFP66 bone-like structure using widefield epifluorescence imaging. Dmp1-mGFP is shown in green and mineral deposition is vitally stained with alizarin red (AzR). Note that at day 8 there are small condensed ridges of Dmp1-mGFP positive cells that are closely associated with bone mineral. By 9.4 days, additional mineral has been deposited as the bone grows and there are more Dmp1-mGFP positive cells (arrows). By 12.7 days, the bone structure has continued its growth and more cells in the new bone have switched on the Dmp1-mGFP transgene (arrows). Many have also adopted an osteocyte-like dendritic morphology. Some of the Dmp1-mGFP cells appear to show motile properties before they adopt their osteocyte-like morphology. This is best appreciated by viewing the accompanying movie (**supplementary movie 1**). In the oldest region of the bone, by 12.7 days many of the cells have switched off expression of Dmp1-mGFP (see bracketed area), suggesting maturation to a late osteocyte phenotype. Bar = 50 $\mu$ m.

**Figure S9**

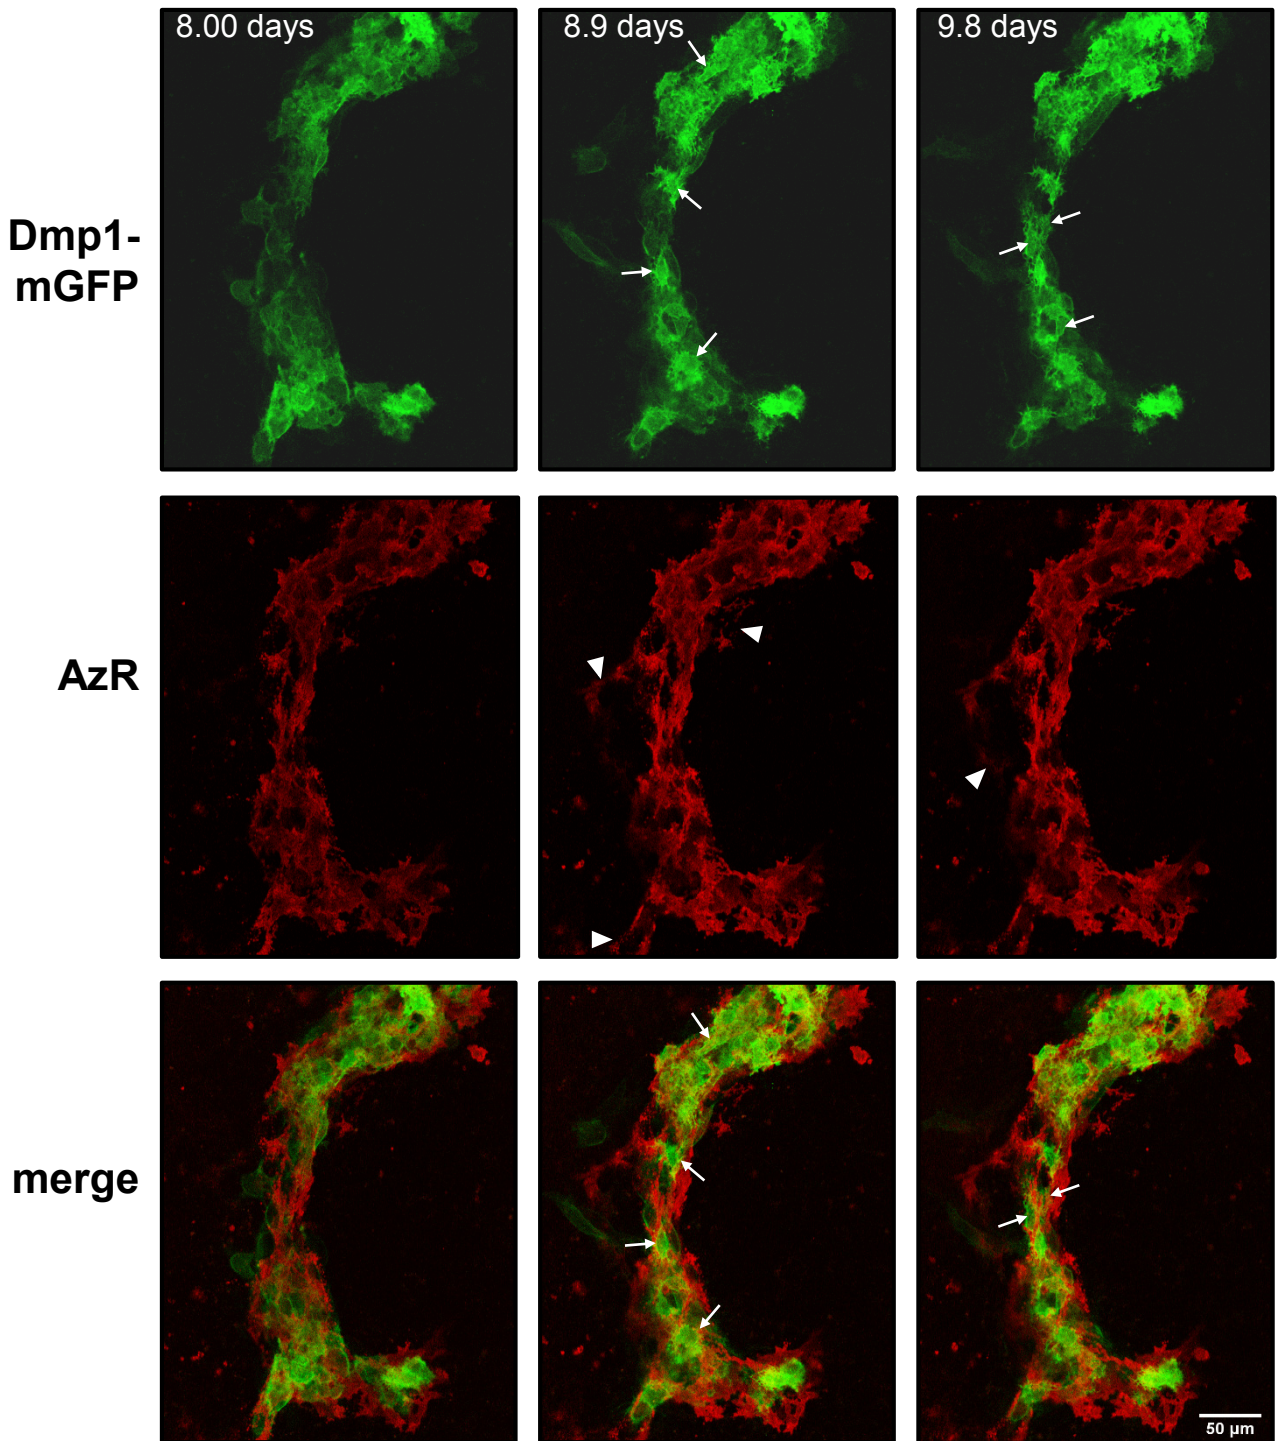

**Figure S9: Confocal timelapse imaging of OmGFP66 bone-like structure.** Still frames from a timelapse movie of a day 8 OmGFP66 bone structure using confocal imaging (single Z-plane). Dmp1-mGFP is shown in green and mineral deposition is vitally stained with alizarin red (AzR). Note that at day 8 there is a condensed ridge of Dmp1-mGFP positive cells closely associated with the bone mineral. Many of these cells can be seen to be motile when viewing the accompanying movie (**supplementary movie 2**). By 8.9 days several of the cells have embedded, increased their intensity of Dmp1-mGFP expression and adopted an osteocyte-like morphology and spacing (arrows). Additional cells appear to switch on Dmp1-mGFP expression in situ within their lacunae by 9.8 days (arrows). A small amount of mineral is added to the forming bone during the 1.8 day imaging period (arrowheads). Please view **supplementary movie 2** to appreciate the dynamic motion of the Dmp1-mGFP positive cells during this maturation process. Bar= 50μm.

## **Legends for Supplementary Movies**

**Movie 1: Widefield epifluorescence timelapse movie in a day 8 OmGFP66 bone-like structure**  
[From left: FIRST PANEL: Dmp1-mGFP; SECOND PANEL: alizarin red (vital stain for mineral); THIRD PANEL: merge of Dmp1-mGFP/alizarin red; FOURTH PANEL: merge of Dmp1-mGFP/alizarin red/differential interference contrast (DIC)]. Note that at the start of the movie (day 8) there are small condensed ridges of Dmp1-mGFP positive cells that are closely associated with bone mineral. By 9.5-10 days, additional mineral is deposited as the bone structure grows downwards and to the left and there are more Dmp1-mGFP positive cells. By 12.7 days, the bone has continued its growth and more cells in the new bone have switched on the Dmp1-mGFP transgene. Many have also adopted an osteocyte-like dendritic morphology. Some of the Dmp1-mGFP cells appear to show motile properties before they adopt their osteocyte-like morphology. In the oldest region of the bone, by 12.7 days many of the cells have switched off expression of Dmp1-mGFP suggesting maturation to a mature osteocyte phenotype (bracketed region in first panel). Bar = 50 $\mu$ m.

**Movie 2: Single z-plane confocal timelapse movie of a day 8 OmGFP66 bone-like structure.**  
[From left: FIRST PANEL: Dmp1-mGFP; SECOND PANEL: alizarin red (vital stain for mineral); THIRD PANEL: merge of Dmp1-mGFP/alizarin red; FOURTH PANEL: merge of Dmp1-mGFP/alizarin red/differential interference contrast (DIC)]. Note that at day 8 there is a condensed ridge of Dmp1-mGFP positive cells closely associated with bone mineral. Many of these cells are motile. By 9 days several of the cells have embedded, increased their intensity of Dmp1-mGFP expression and adopted an osteocyte-like morphology and spacing. Additional cells appear to switch on Dmp1-mGFP expression in situ within their lacunae by 9-10 days. A small amount of mineral is added to the forming nodule during the 1.8 day imaging period (arrowheads). Bar = 50 $\mu$ m.
